# Supplementary material
Source: PubMed Central journal article supplement (PMC5390486)

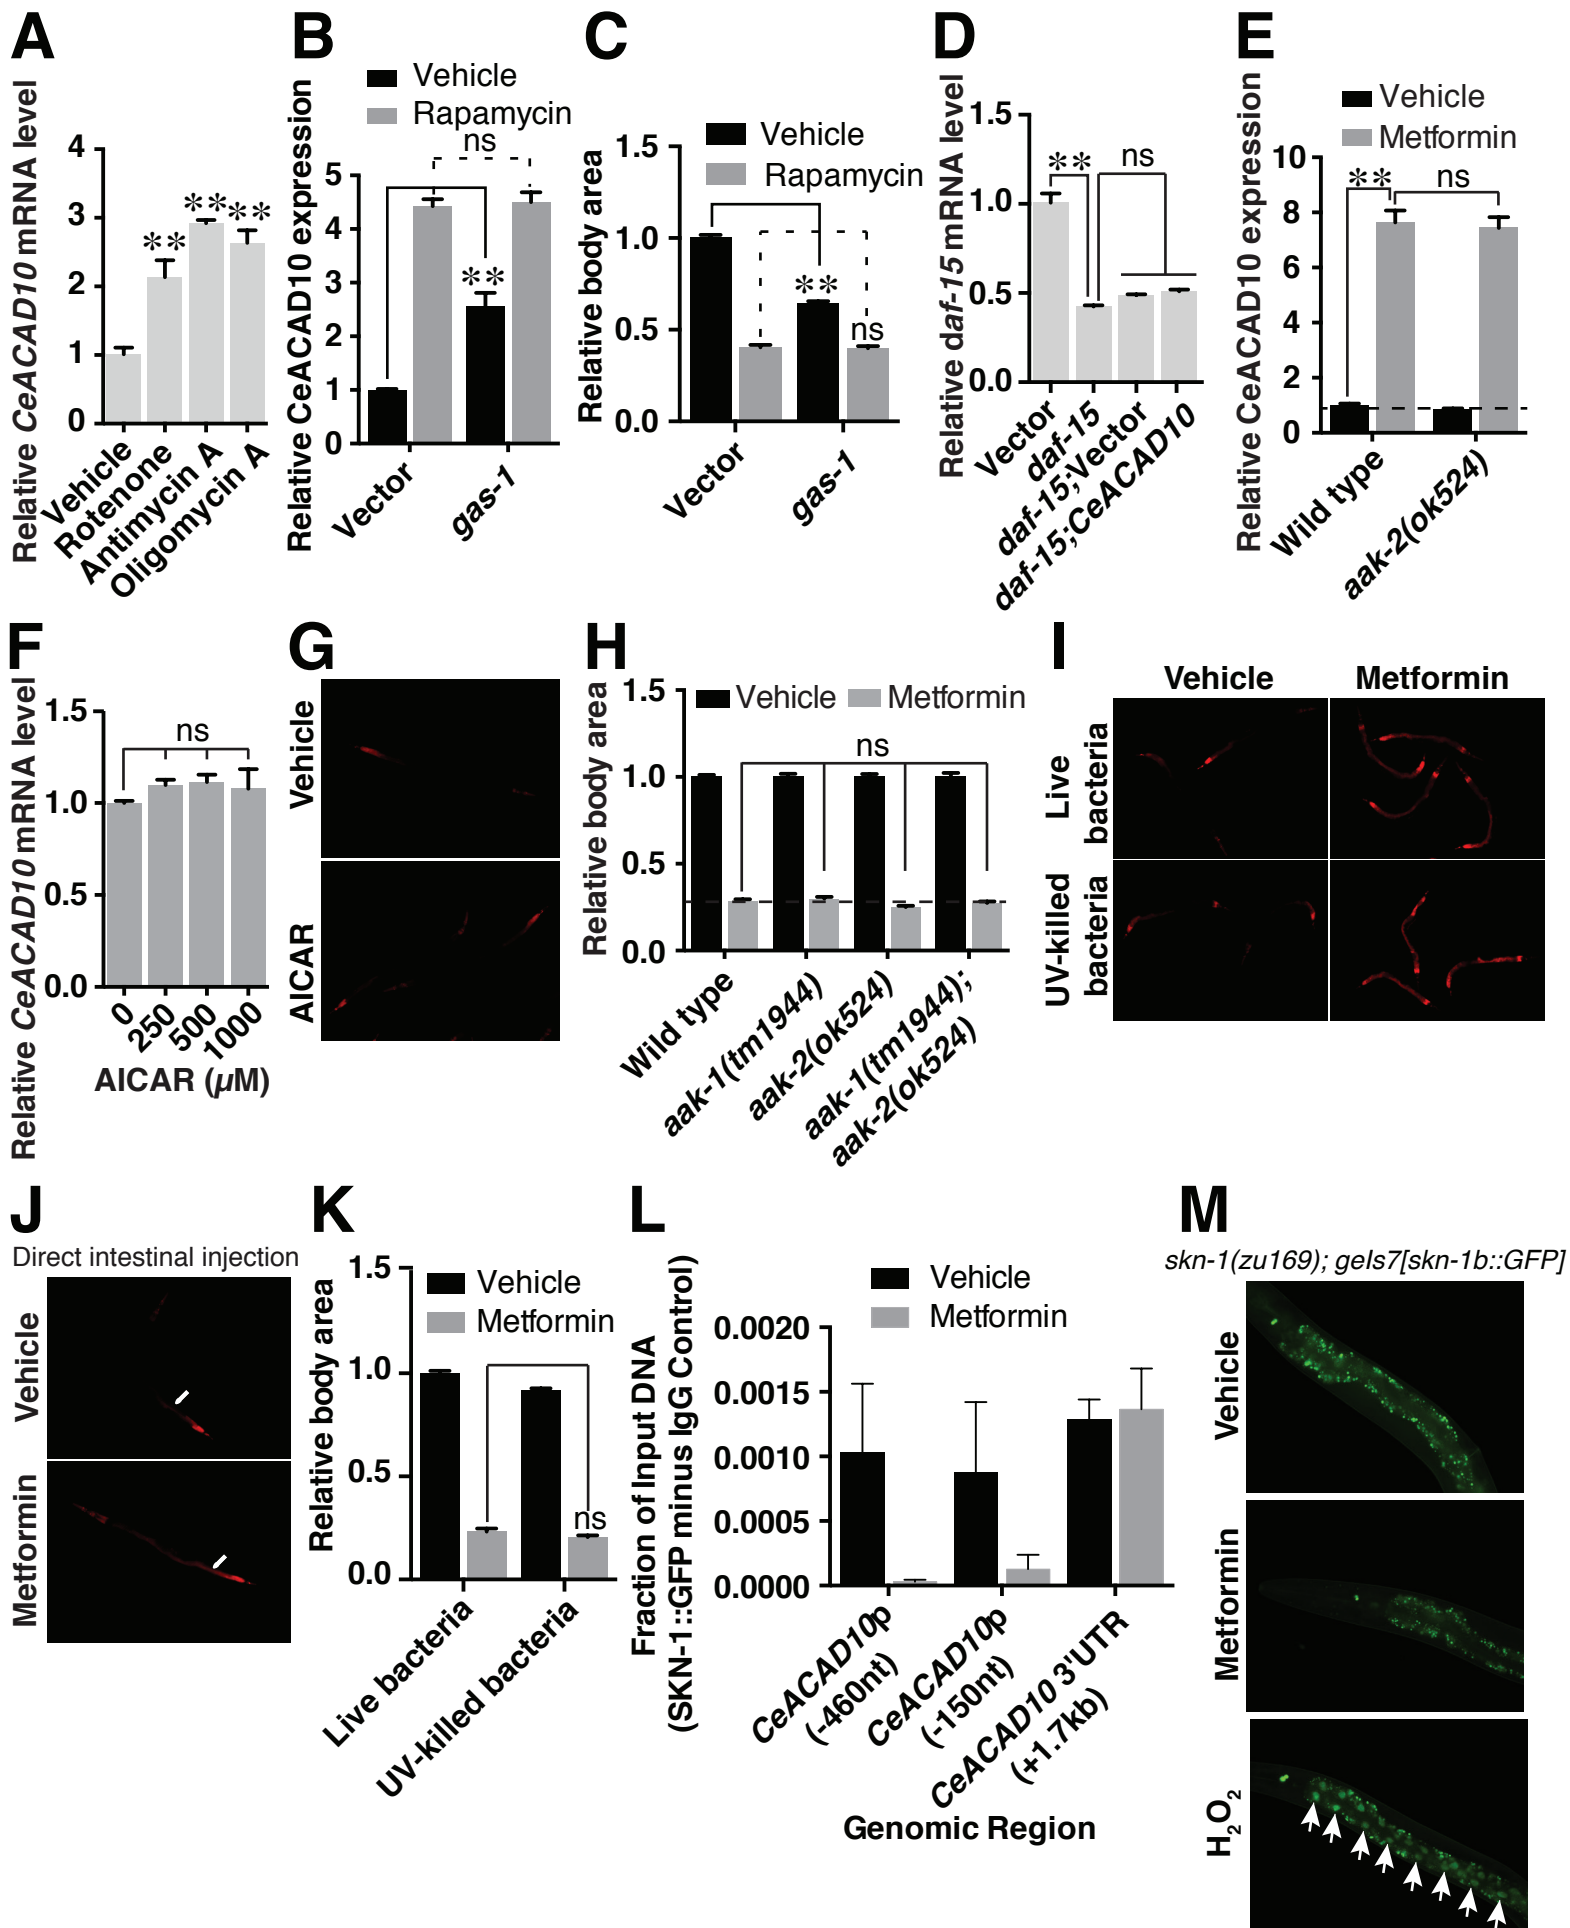

Supplement: NIHMS837469-supplement-2.pdf [file NIHMS837469-supplement-2.pdf]

**A**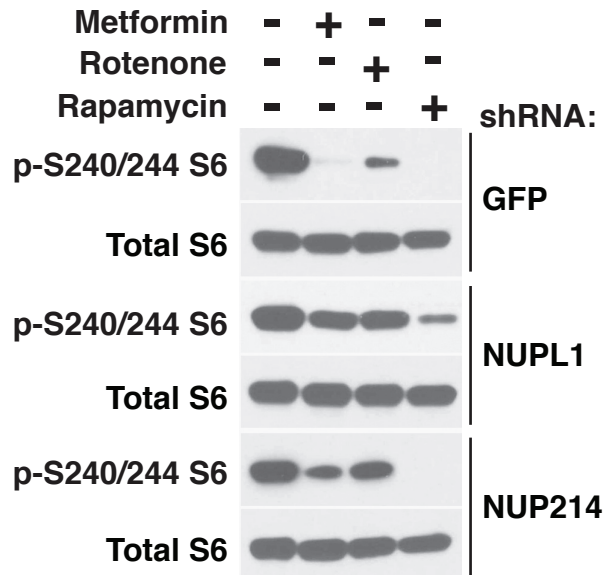**B**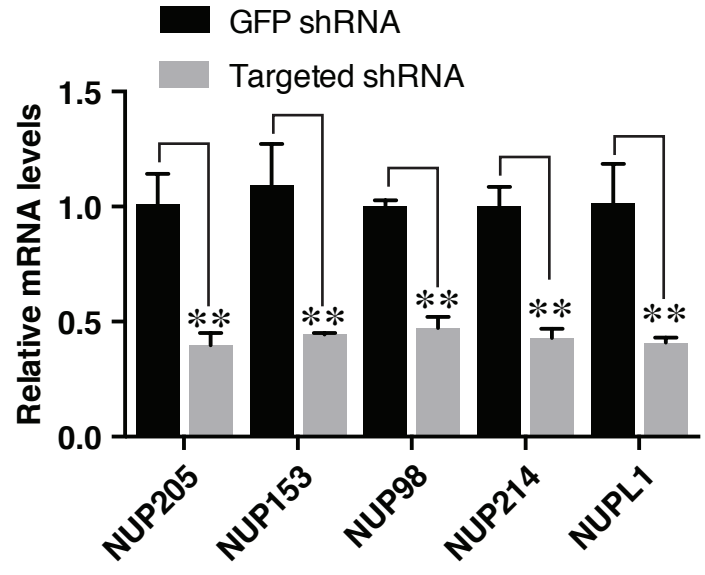

Supplement: NIHMS837469-supplement-4.pdf [file NIHMS837469-supplement-4.pdf]

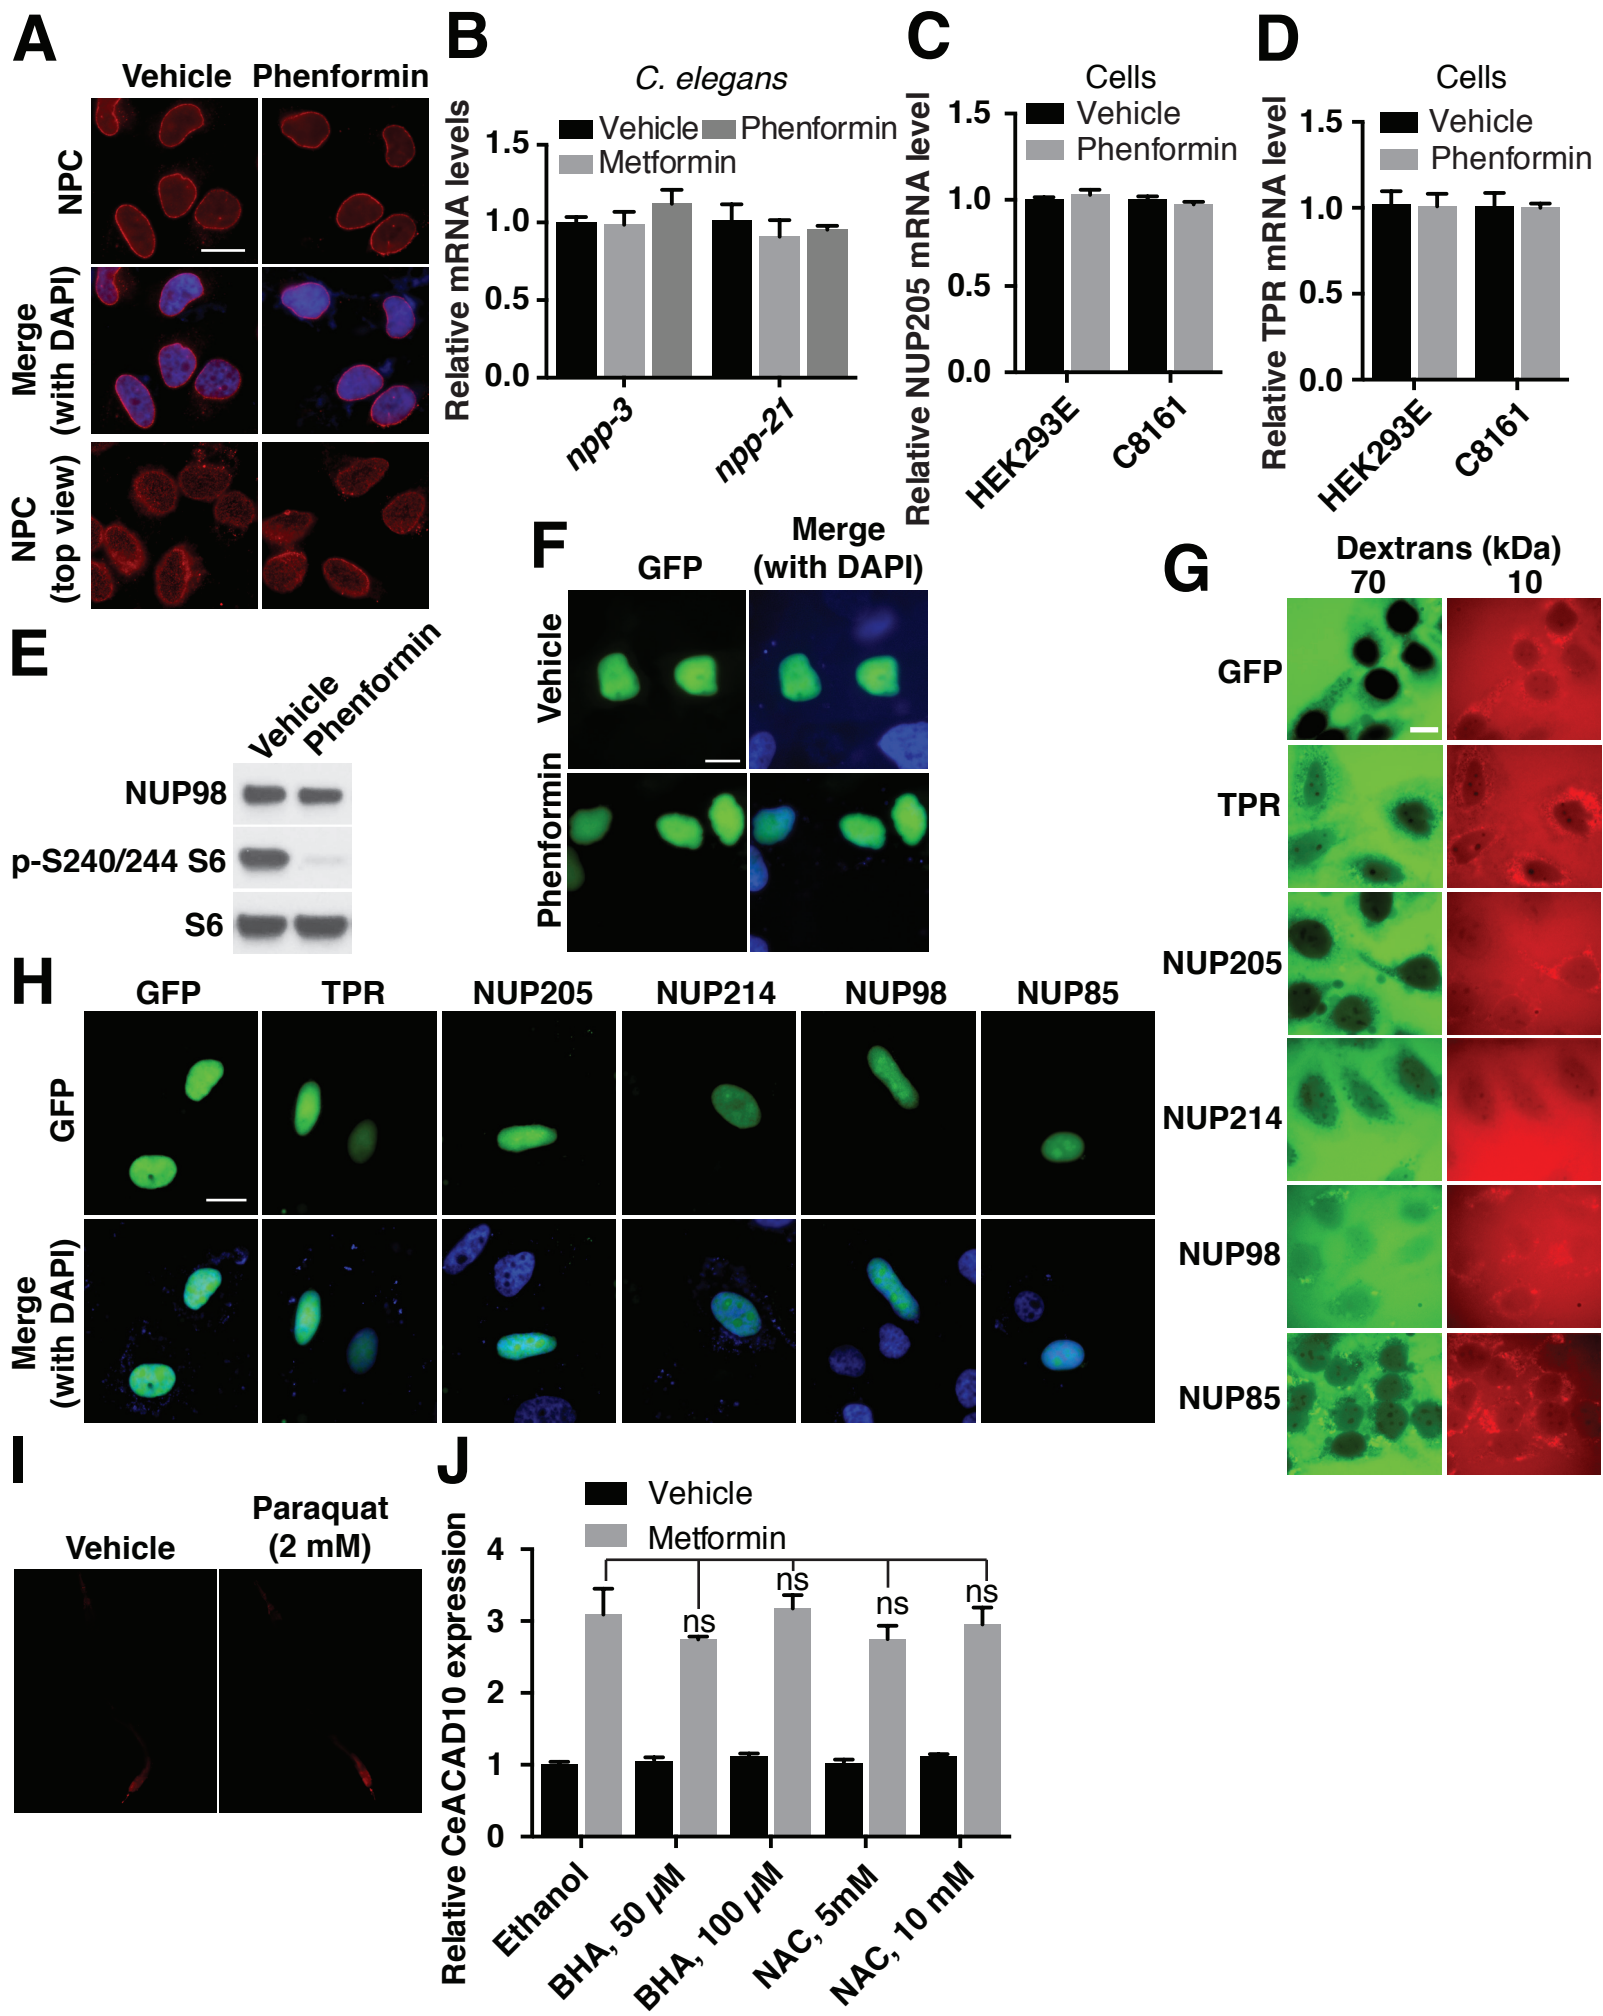

Supplement: NIHMS837469-supplement-5.pdf [file NIHMS837469-supplement-5.pdf]

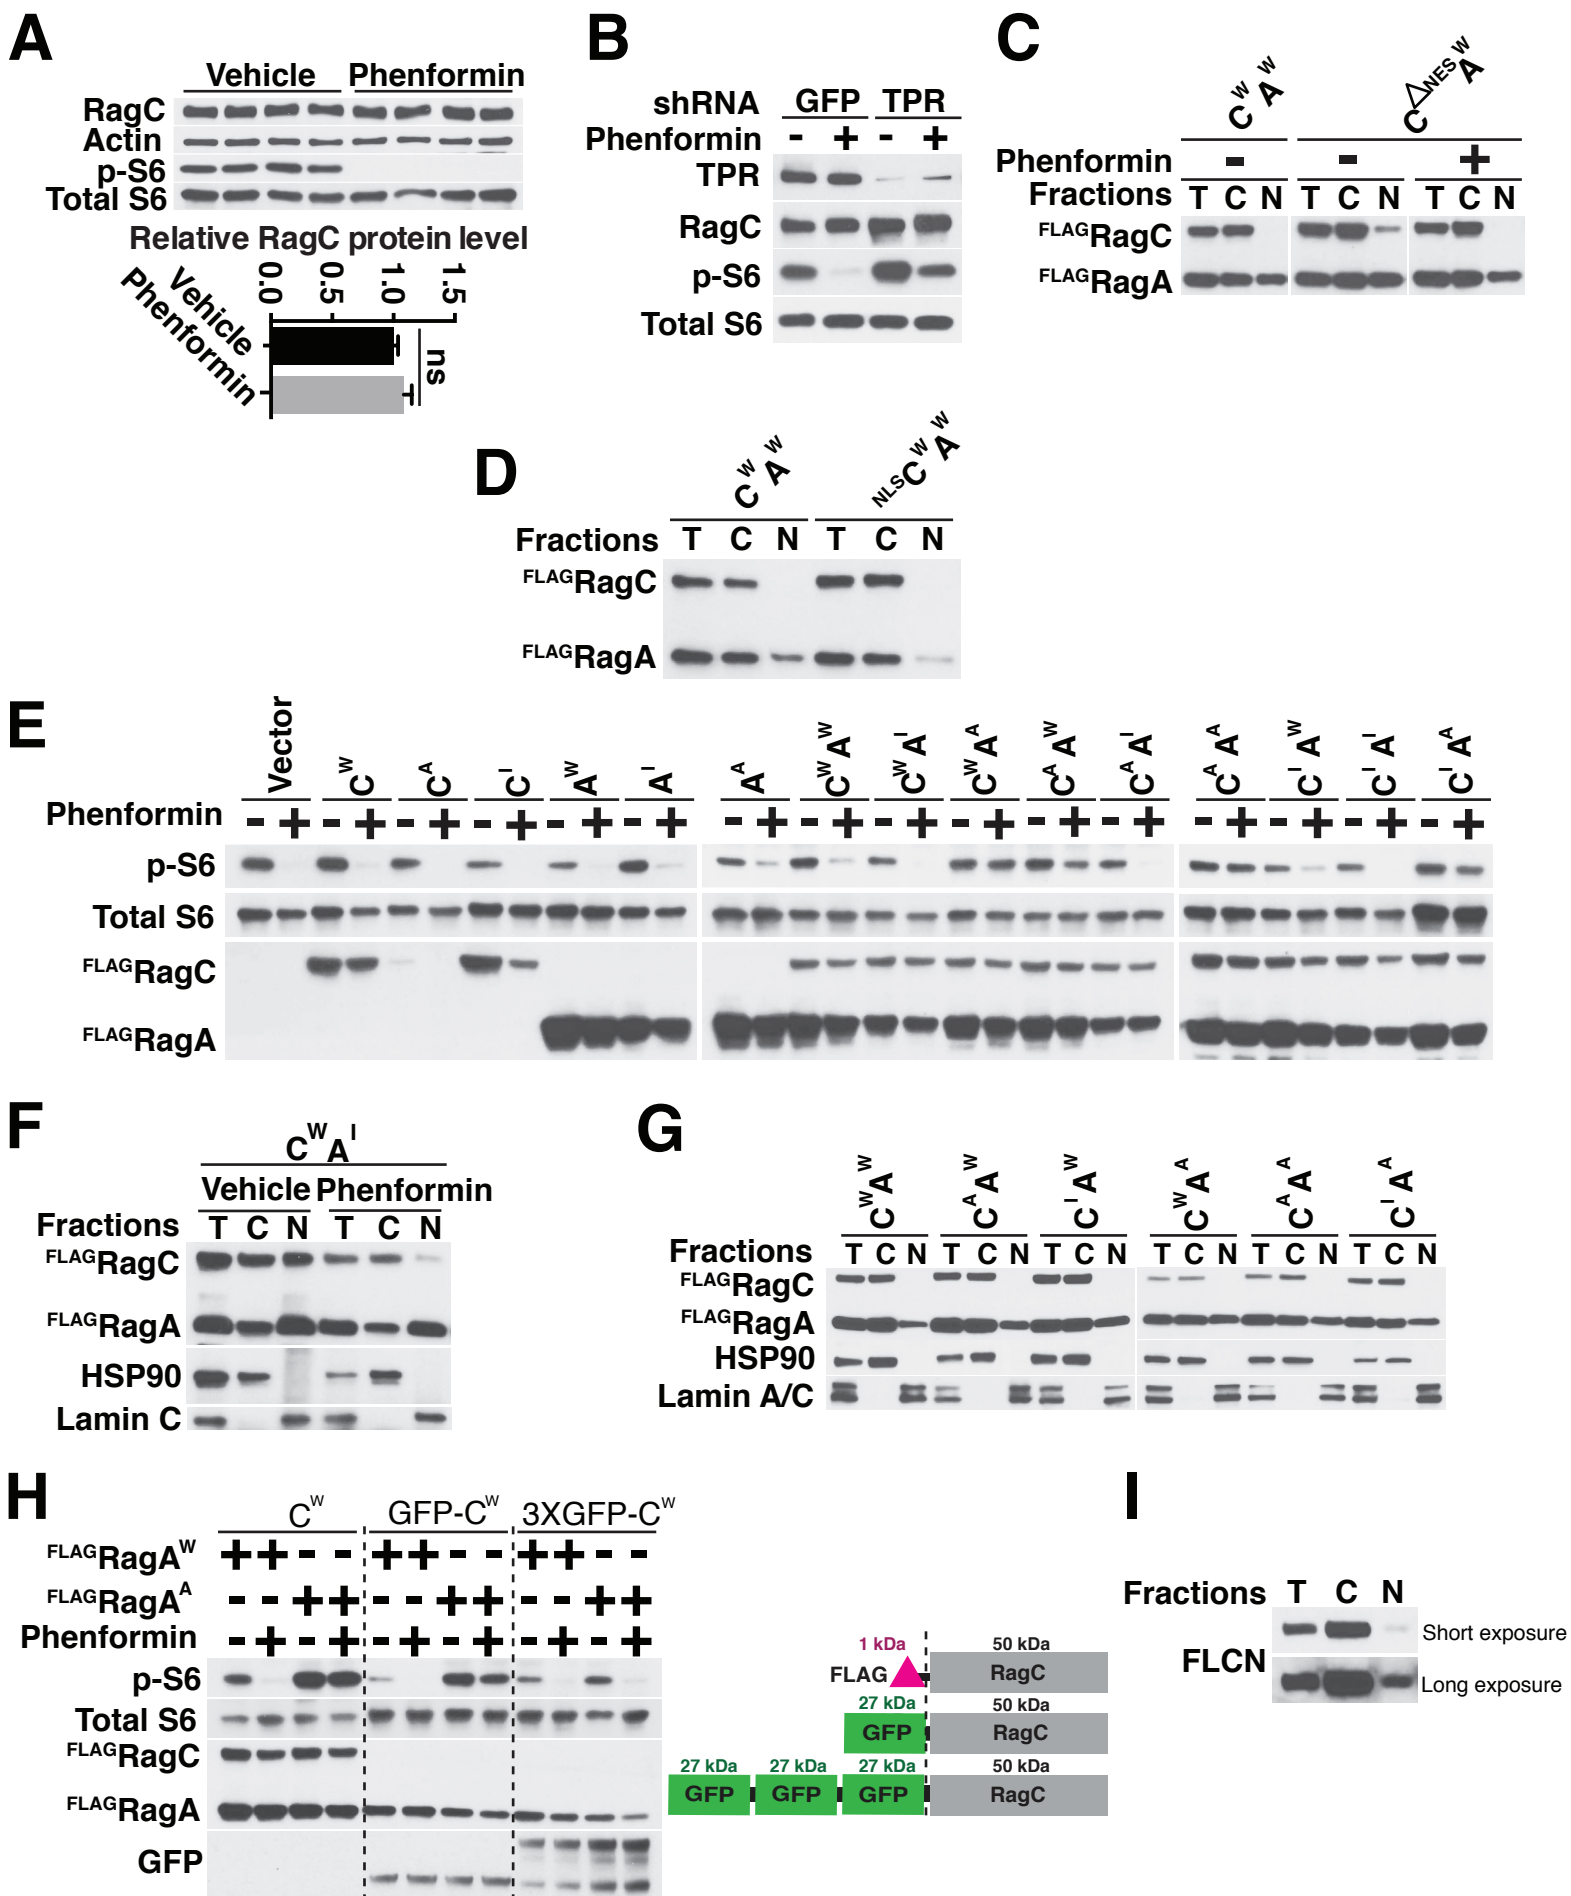

Supplement: NIHMS837469-supplement-6.pdf [file NIHMS837469-supplement-6.pdf]
